# Supplementary material for: Freeze-thaw damage of architectural heritage grey brick materials based on fractal theory
Source: Research Square preprint supplement (doi:10.21203/rs.3.rs-6016228/v1), 2025-04-23
Supplement: Supplementary file 1 [file 4eeb2be0e20fc4de5ef6994e.docx]

| **Reporting checklist** |
| --- |
| **1.** **Modify the marked manuscript** |
| **2. manuscript** |
| **3. Response to Reviewers Comments** |
| **4. All the pictures in the manuscript** |
| **5. Supplementary information:**  **(1) Data Availability**  **(2) Acknowledgements**  **(3) Author Contributions**  **(4) Competing Interests**  **(5)A full references list**  **(6) List of Graph Titles** |

**Supplementary information**

**Data Availability**

All data and models during the study appear in the published paper.

**Acknowledgments**

The authors are grateful for support from the National Natural Science Foundation of China (Nos:12272190) for their support.

**Author contributions**

Jiong Gao: Investigation, Data curation, Writing-original draft, Visualization. Yunhong Hao: Writing - review and editing, Methodology, Funding acquisition. Jiaoyu Xuan: Investigation, Writing- review & editing. Rigen Wu: Resources, Investigation.

**Competing interests**

The authors declare no competing interests.

**Reference**

1 Tang, Y. J. & Shao, Z. D. The effect of climate on the deterioration of ancient tower bricks. *Sci. Conserv. Archaeol*. 24(3):33-39 (2012) (in Chinese).

2 Binda, L., Tiraboschi, C. & Baronio, G. On-site investigation on the remains of the Cathedral of Noto. *Constr. Build. Mater*. 17(8), 543-555 (2003).

3 Sathiparan, N. & Rumeshkumar, U. Effect of moisture condition on mechanical behavior of low strength brick masonry. *J Build Eng*. 17, 23-31 (2018).

4 Wu, A. L., Liu, K., Hao, Y. H., Wu, R. G. & Xuan, J. Y. Freeze-Thaw Damage of Ancient Architectural Grey Bricks Based on Fractal Theory. *J. Build. Mater*. 27(8), 701-710 (2024) (in Chinese).

5 Zhang, D. M., Wang, L., Guo, G. l., Wang, Y. & Wang, W. C. Effect of the freeze-thaw on macroscopic properties and microstructural degradation of ancient grey bricks. *Sci. Conserv. Archaeol*. 33(04), 9-15 (2021) (in Chinese).

6 Shi, J. S., Chun, Q., Feng, S. H., Liu, C., Liu, Z. Y., Wang, D. F. & Zhang, Y. Pore structure and fractal dimension analysis of ancient city wall bricks in China. *J Build Eng*. 76, 107324 (2023).

7 Bruno, A. W., Gallipoli, D. & Perlot, C. Effect of freezing-thawing cycles on the physical and mechanical properties of fired and unfired earth bricks. *J Build Eng*. 52, 104501 (2022).

8 Liu, J. X. & Wang, Y. Z. Performance degradation mechanism of adobe materials under freeze-thaw cycles based on moisture transportation characteristics and microstructural analysis. *Constr. Build. Mater*. 411, 134464 (2024).

9 Perrin, B., Vu, N. A., Multon, S., Voland, T. & Ducroquetz, C. Mechanical behaviour of fired clay materials subjected to freeze–thaw cycles. *Constr. Build. Mater*. 25(2), 1056-1064 (2011).

10 Wardeh, G. & Perrin, B. Freezing-thawing phenomena in fired clay materials and consequences on their durability. *Constr. Build. Mater*. 22(5), 820-828 (2008).

11 Huan, W. J., Zhang, Y. S., Liu, G. J. & Zhao, P. "Performance deterioration and microstructure evolution of clay brick submitted to freeze-thaw cycles. *J. Southeast Univ. Nat. Sci. Ed*. 44(2), 401-405 (2014) (in Chinese).

12 Hao, Y. H., Li, J., Wang, Y. H., He, X. Y. & X, C. G. Investigation on Damage Performance of Coal Gangue-iron Tailings Sintered Porous Brick under Freeze-thaw Cycles. *Sci. Technol. Eng*. 23(31), 13533-13541 (2023) (in Chinese).

13 Uranjek, M. & Bokan-Bosiljkov, V. Influence of freeze-thaw cycles on mechanical properties of historical brick masonry. *Constr. Build. Mater*. 84, 416-428 (2015).

14 Yue, J. W. et al. Study on Deterioration of Gray Brick with Different Moisture Contents under Freeze-Thaw Environment. *Materials*. 15(5) (2022).

15 Netinger Grubesa, I., Vracevic, M., Ranogajec, J. & Vucetic, S. Influence of Pore-Size Distribution on the Resistance of Clay Brick to Freeze-Thaw Cycles. *Materials*. 13(10) (2020).

16 Zhao, P., Lei, Q., Zhang, X. Z., Huan, W. J. & Ma, H. J. Durability and life prediction of Chinese traditional black bricks under freezing and thawing conditions. *Rev Rom Mater*. 49(1), 157-166 (2019).

17 Tang, Y. J., Shao, Z. D. & Xu, T. L. Uniaxial compressive tests on ancient brick masonry from heritage buildings under unsaturated freeze-thaw conditions. *Constr. Build. Mater*. 183, 706-715 (2018).

18 Mandelbrot, B. B. The Fractal Geometry of Nature: Updated and Augmented. New York: W.H. Freeman and Co (1983).

19 Volchuk, V. & Kotov, M. Fractal express methods evaluation of a breaking stress of concrete. *Journal of Physics:Conference Series*. 1926(1):12-23 (2021).

20 Gao, S., Li, Q. Y. & Luo, J. L. Fractal characteristic of recycled aggregate and its influence on physical property of recycled aggregate concrete. *Rev Adv Mater Sci*. 60(1), 663-677 (2021).

21 Xie, F. X., Jin, Z. H., Yang, T. F., Han, X., Chen, X. D. & Zhang, Y. Experimental study of dynamic splitting-tensile properties of precast concrete samples under different strain rates. *Constr Build Mater*. 372. (2023).

22 Zhang, Q., Xia, Y. J., Zhao, J. C., Tang, C. & Zhang, B. Experimental investigation of crack evolution in expansive soil-rubber mixture (ESR) under freeze-thaw cycles. *Cold Reg Sci Technol*. 217. (2024).

23 Xu, H. Y., Bu, J. W., Chen, X. D., Chen, Q. & Xu, B. Fracture behavior of dredged sand concrete under freeze-thaw cycles. *Constr Build Mater*, 366 (2023).

24 Cao, R. H. et al. Effects of cyclic freeze-thaw treatments on the fracture characteristics of sandstone under different fracture modes: Laboratory testing. *Theor Appl Fract Mec*. 109 (2020).

25 Wang, X. J., Zhang, X. D., Jing, P. F. & Li, J. Fractal fracture characteristics of asphalt concrete freeze-thaw cycles. *Mech. Eng*. 45(01), 100-112 (2023) (in Chinese).

26 Guo, Y. C., Shen, A. Q., He, T. Q. & Zhou, S. B. Micro-crack propagation behavior of pavement concrete subjected to coupling effect of fatigue load and freezing-thawing cycles. *J Traffic Transp Eng*. 16(5), 1-9. (2016).

27 Liu, C. J., Zhang, Q. J., Zhu, Q. & Deng, H. W. Effect of cyclic freeze-thaw treatments on the dynamic fracture characteristics of granite: Laboratory testing. *Eng Fract Mech*. 276 (2022).

28 Zhang, K., Ye, J. & Liu, X. Energy evolution and fractured fractal characteristics of loaded sandstone under freeze-thaw cycles. *J. Saf. Sci. Technol*. 17(8), 111-116 (2021) (in Chinese).

29 Yu, Y., Jiang, Q. C., Liu, Q., Feng, G. L., Zeng, J. J. & Lu, Y. Y. Experimental study on dynamic failure behavior of red sandstone after freeze-thaw cycles. *Constr Build Mater*. 451: 138582 (2024).

30 He, M. C., Yang, G. X., Jiang, J. L., Jia, X. N. & Jiang, T. T. Classification and research methods of rockburst experimental fragments. *Chin. J. Rock Mech. Eng*. 28(8), 1521-1529 (2009) (in Chinese).

31 Deng, Y., Chen, M. A., Jin, Y. & Zou, D. W. Theoretical analysis and experimental research on the energy dissipation of rock crushing based on fractal theory. *J Nat Gas Sci Eng*. 33, 231-239 (2016).

32 Peng, R. D., Ju, Y., Wang, J. G., Xie, H. P., Gao, F. & Mao, L. T. Energy Dissipation and Release During Coal Failure Under Conventional Triaxial Compression. *Rock Mech Rock Eng*. 48(2), 509-526 (2015).

33 Xie, H. P., Li, L. Y., Peng, R. D. & Ju, Y. Energy analysis and criteria for structural failure of rocks. *J Rock Mech Geotech*. 1(1), 11-20 (2009).

34 de Behr, V., Hornick, J. L., Cabaraux, J. F., Alvarez, A. & Istasse, L. Growth patterns of Belgian Grey replacement heifers and growing males in commercial farms. *Livest. Prod. Sci*. 71(2-3), 121-130 (2001).

35 Zhang, S., Wang, H. Y., Li, X. J., Zhang, X. L., An, D. C. & Yu, B. X. Experimental study on development characteristics and size effect of rock fracture process zone. *Eng Fract Mech*. 241 (2021).

36 Zhang, X., Li, X. S., Liu, Y. H., Liu, W., Li, Q. H. & Li, L. Experimental study on crack propagation and failure mode of fissured shale under uniaxial compression. *Theor Appl Fract Mec*. 121 (2022).

37 Lai, Y. M. et al. Fractal characteristics of rocks and mesoscopic fractures at different loading rates. *Geomech Energy Envir*. 33 (2023)

38 Lu, Y., Liu, S. H., Weng, L. P., Wang, L. J., Li, Z. & Xu, L. Fractal analysis of cracking in a clayey soil under freeze-thaw cycles. *Eng Geol*. 208, 93-99 (2016).

39 Liu, D. Q., Li, D. J., Zhao, F. & Wang, C. C. Fragmentation characteristics analysis of sandstone fragments based on impact rockburst test. *J Rock Mech Geotech*. 6(3), 251-256 (2014).

40 Li, D. J., Guan, L., Han, L. Q. & Miao, C. Analysis of micro-crack characteristics from rockburst failure of basalt in Baijiao Coal Mine content. Journal of China Coal Society. 39(2), 307-314 (2014)

41 Yin, Y. J., Ren, Q. W., Lei, S., Zhou, J. K., Xu, L. & Wang, T. Mesoscopic crack pattern fractal dimension-based concrete damage identification. Engineering Fracture Mechanics, 296 (2024) (in Chinese).

42 Zamen, S. & Dehghan-Niri, E. Fractal analysis of nonlinear ultrasonic waves in phase-space domain as a quantitative method for damage assessment of concrete structures. *Ndt&e Int*. 111 (2020).

|  |
| --- |
| Fig. 1 Comparison diagram of ancient grey brick and antique grey brick: （a）Ancient brick;（b）Brick specimens. |

| 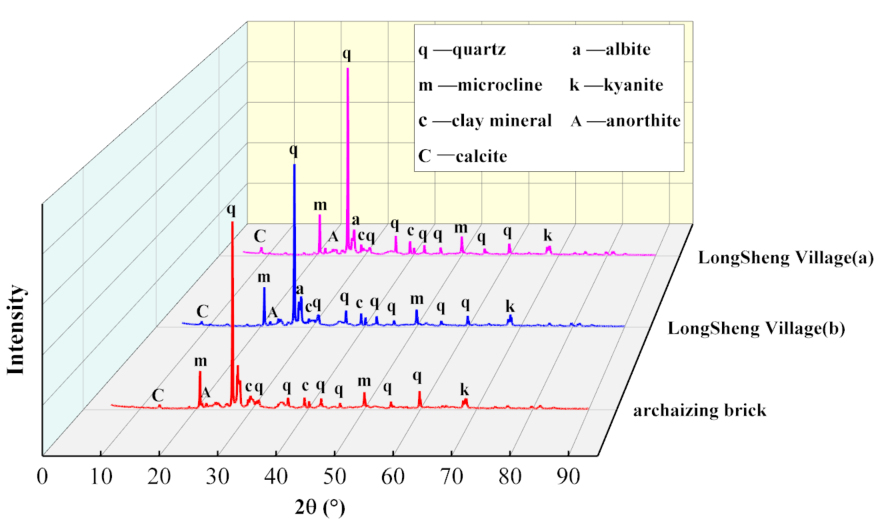 |
| --- |
| Fig. 2 XRD composition analysis of antique grey brick/ancient brick. |

| 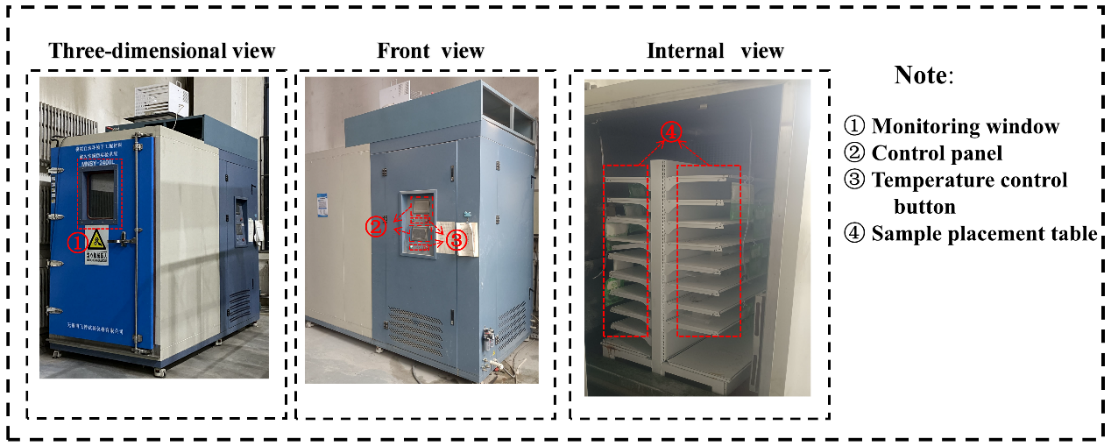 |
| --- |
| Fig. 3 Freezing and thawing cycles test chamber. |

| 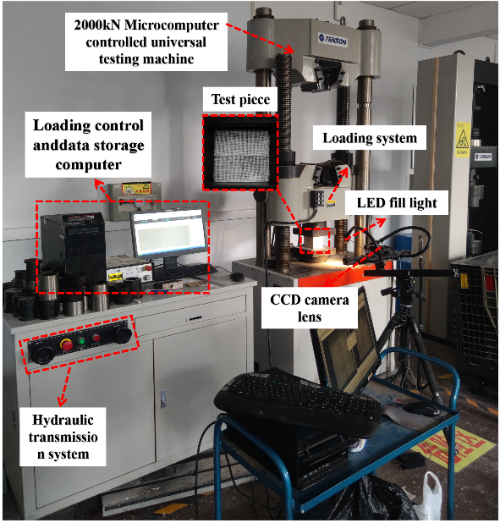 |
| --- |
| Fig. 4 Uniaxial compression test of grey brick. |

| 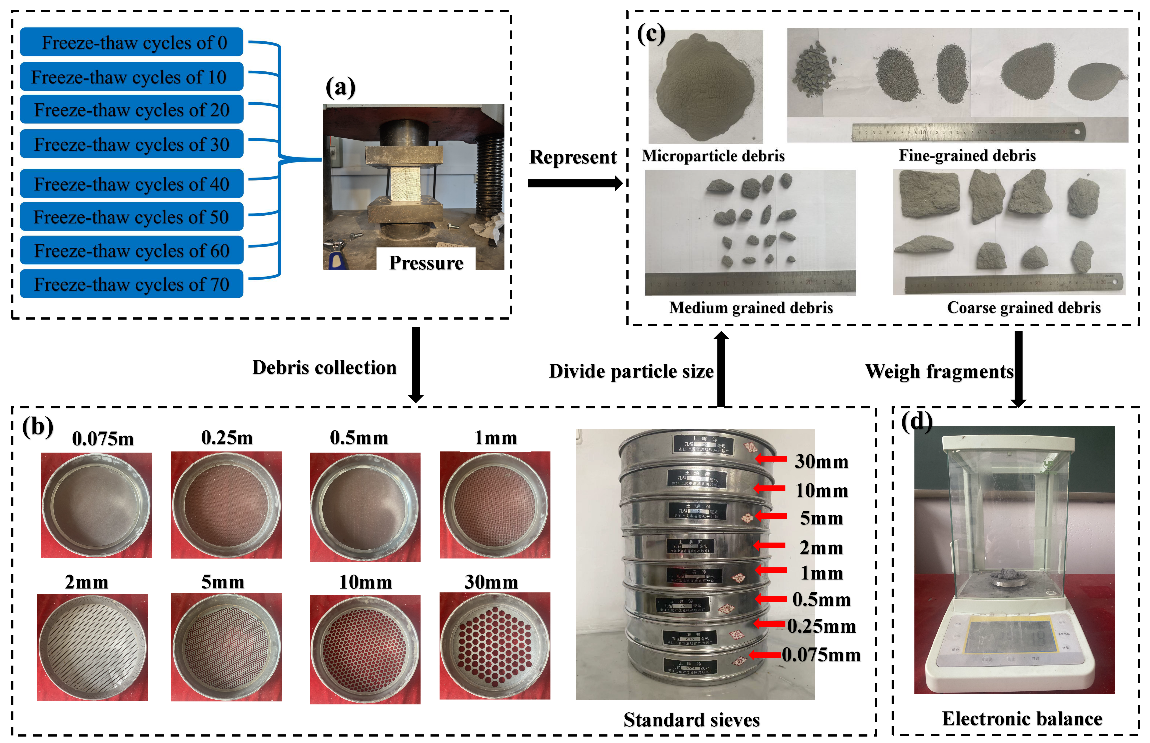 |
| --- |
| Fig. 5 Experimental process. |

|  |
| --- |
| Fig.6 Grey brick debris mass distribution diagram. |

| 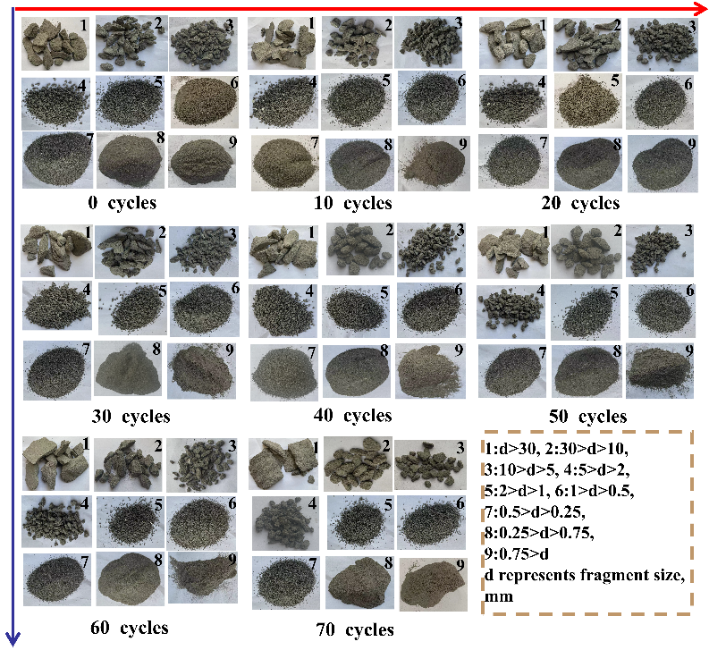 |
| --- |
| Fig. 7 Grey brick debris distribution diagram. |

|  |
| --- |
| Fig. 8 Characteristic size ratio distribution diagram of grey brick debris: (a) 0 cycles; (b) 10 cycles; (c) 20 cycles; (d) 30 cycles; (e) 40 cycles; (f) 50 cycles; (g) 60 cycles; (h) 70 cycles. |

|  |
| --- |
| Fig 9. Fractal dimension determined by particle size-quantity relationship: (a) 0 cycles ; (b) 10 cycles; (c) 20 cycles ; (d) 30 cycles ; (g) 60 cycles ; (h) 70 cycles. |

|  |
| --- |
| Fig 10. Fractal dimension determined by mass-granularity relationship: (a) 0 cycles ; (b) 10 cycles; (c) 20 cycles ; (d) 30 cycles ; (g) 60 cycles ; (h) 70 cycles. |

|  |
| --- |
| Fig. 11 The variation of fractal dimension during cycles of freeze-thaw. |

| 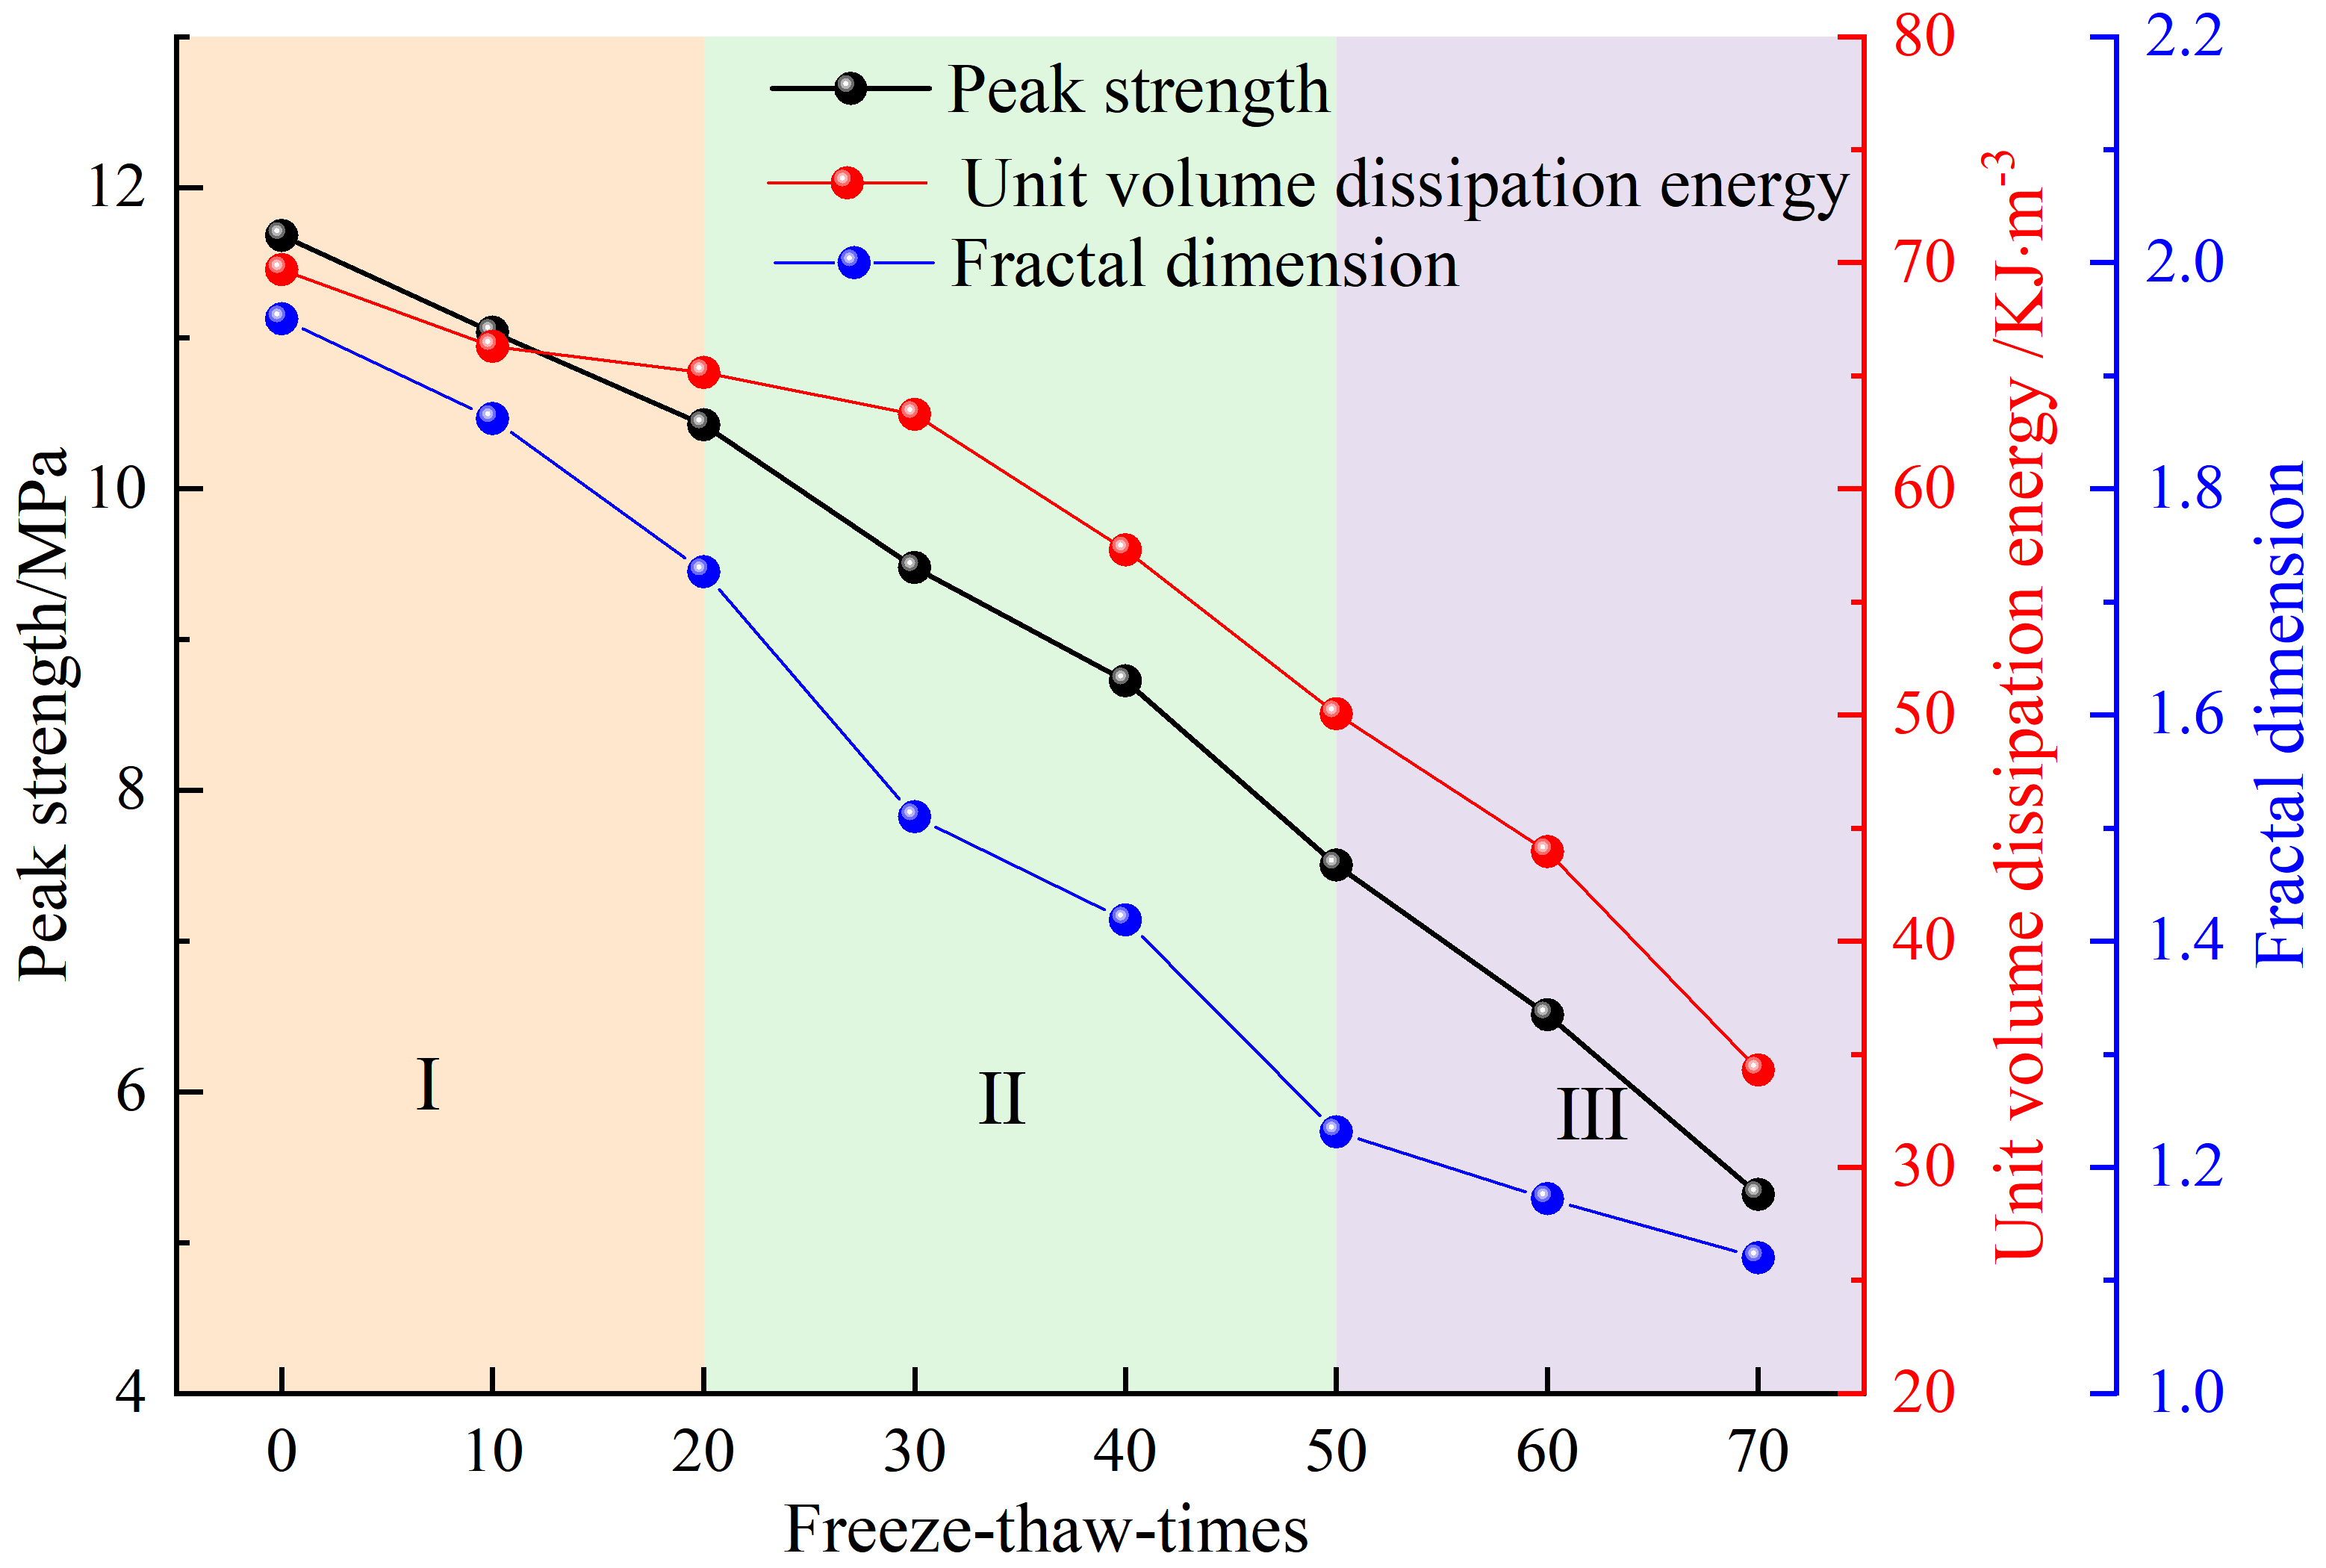 |
| --- |
| Fig. 12 The variation of compressive strength, energy dissipation per unit volume, and fractal dimension with the amount of cycles of freezing and thawing. |

|  |
| --- |
| Fig. 13. Diagram of crack evolution characteristics of grey brick during loading: (a) 0 cycles ; (b) 10 cycles; (c) 20 cycles ; (d) 30 cycles ; (g) 60 cycles ; (h) 70 cycles. |

| 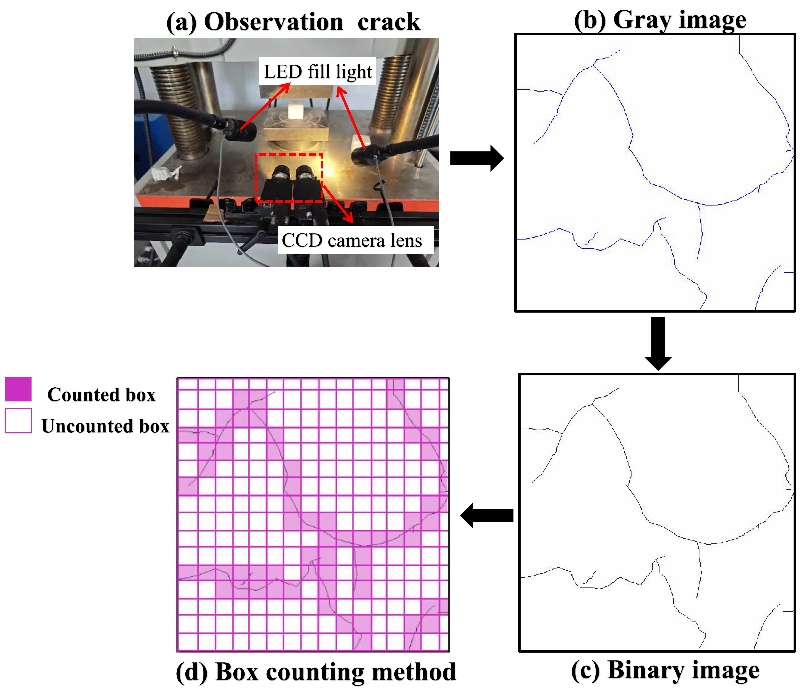 |
| --- |
| Fig. 14 Diagram of fracture fractal dimension calculation process. |

|  |
| --- |
| Fig. 15 Crack fractal dimension fitting curve schematic diagram: (a) 0 cycles ; (b) 10 cycles; (c) 20 cycles ; (d) 30 cycles ; (g) 60 cycles ; (h) 70 cycles. |

|  |
| --- |
| Fig. 16 Change diagram of fracture fractal dimension. |

|  |
| --- |
| Fig. 17 Change curve of damage factor of grey brick. |
| 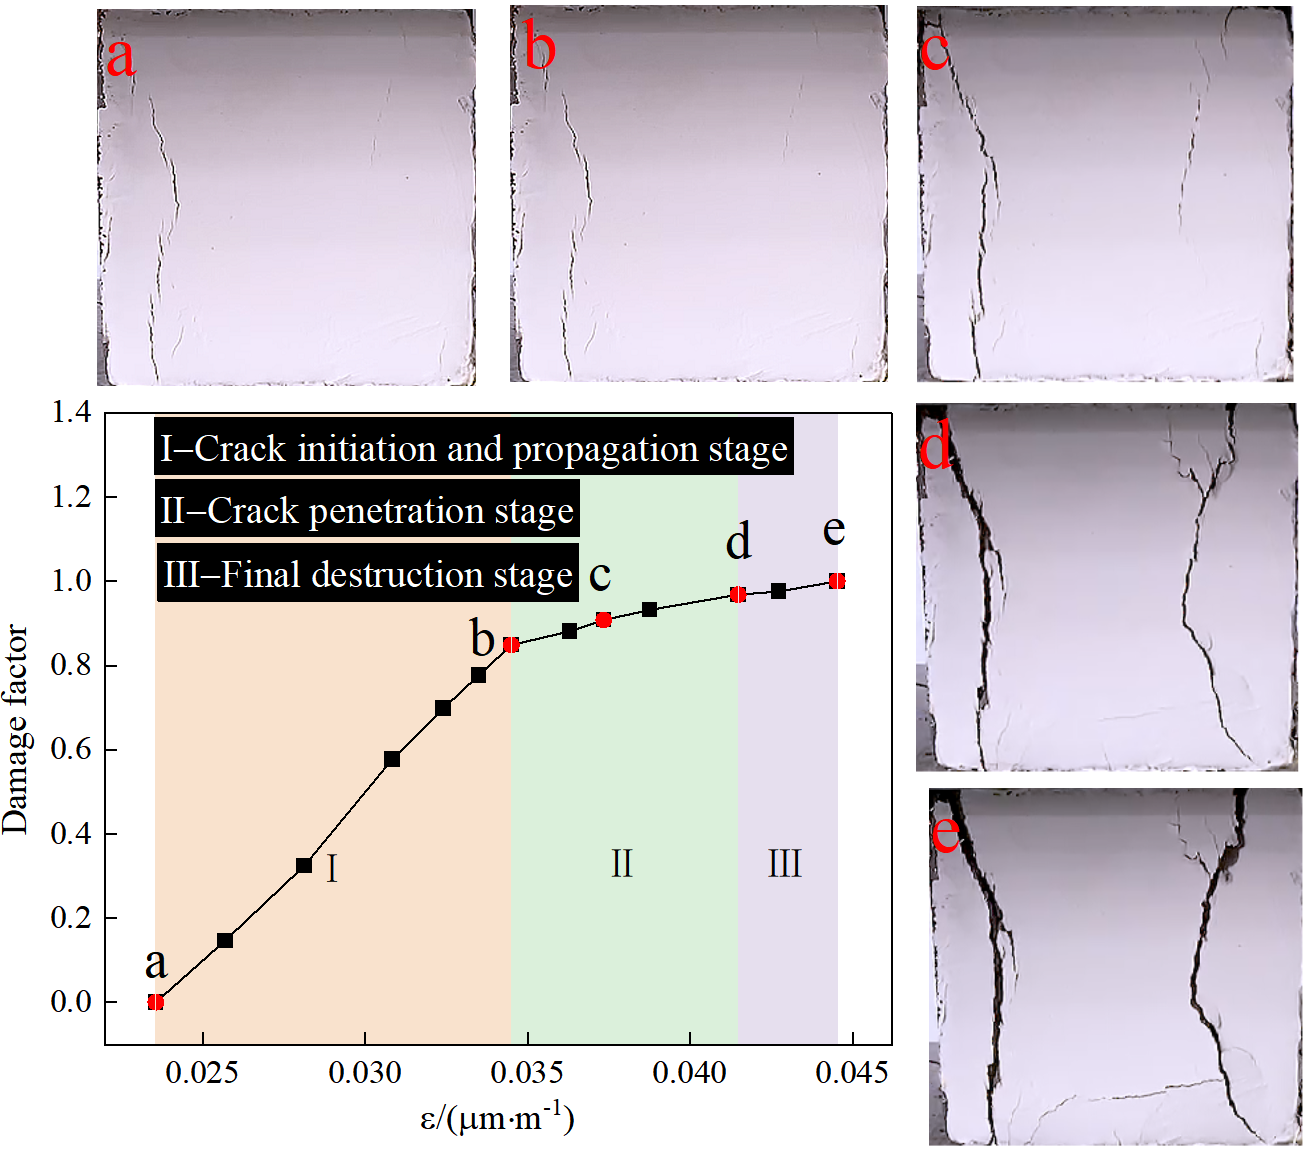 |
| Fig. 18 Crack propagation morphology distribution diagram at key points. |

|  |
| --- |
| Fig. 19. Grey brick damage factor evolution curve diagram: (a) Quantity of cycles of freeze-thaw; (b) Strain normalization. |

Table 1. Performance distribution table of ancient grey brick / antique grey brick.

| Specimen/  Physical property | | Density/ | Water absorption/% | Apparent hardness /MPa | Compressive strength /MPa |
| --- | --- | --- | --- | --- | --- |
| Longshengzhuang ancient grey brick | Mean value | 1.9 | 1.68 | 121.12 | 8.81 |
| Antique grey brick | Mean value | 2.1 | 1.72 | 130.76 | 10.26 |

|  |
| --- |
| Fig. 20 The varying curves of different parameters with the amount of cycles of freezing and thawing: (a) First fitting parameter; (b) Strain value. |

Table 2. XRF quantitative analysis of antique grey brick/ ancient brick.

| Specimen | SiO2 | CaO | Al2O3 | Fe2O3 | K2O | MgO | Na2O | TiO2 | Other |
| --- | --- | --- | --- | --- | --- | --- | --- | --- | --- |
| Antique grey brick | 47.51 | 16.95 | 13.98 | 9.69 | 4.15 | 3.56 | 2.07 | 1.12 | 0.97 |
| Longshengzhuang ancient grey brick | 45.58 | 19.36 | 13.13 | 9.84 | 3.96 | 3.01 | 2.37 | 1.26 | 1.49 |

Table 3. Statistics of grey brick debris screening test.

| The mass fraction of compressed debris of grey bricks after different freeze-thaw cycles（%） | | | | | | | | | |
| --- | --- | --- | --- | --- | --- | --- | --- | --- | --- |
| Freeze-thaw cycles | Particle size range（mm） | | | | | | | | |
| Coarse grain group | Medium grain group | | Fine grain group | | | | | Microparticle group |
| >30 | 10~30 | 5~10 | 2~5 | 1~2 | 0.5~1 | 0.25~0.5 | 0.075~0.25 | 0.075< |
| 0 | 51.94 | 7.84 | 3.59 | 7.86 | 7.08 | 7.44 | 4.82 | 6.39 | 3.04 |
| 10 | 60.02 | 6.85 | 3.18 | 5.92 | 3.68 | 5.71 | 4.71 | 6.57 | 3.37 |
| 20 | 63.06 | 7.51 | 3.51 | 4.43 | 5.01 | 3.97 | 3.86 | 6.44 | 2.21 |
| 30 | 65.11 | 6.01 | 2.63 | 5.17 | 3.02 | 5.44 | 4.04 | 5.79 | 2.83 |
| 40 | 65.96 | 8.39 | 3.71 | 4.32 | 2.68 | 3.75 | 3.81 | 4.95 | 2.46 |
| 50 | 68.38 | 6.79 | 5.27 | 4.44 | 2.77 | 3.62 | 3.79 | 3.55 | 1.39 |
| 60 | 71.57 | 7.49 | 5.32 | 4.47 | 2.68 | 1.59 | 2.36 | 2.38 | 2.13 |
| 70 | 73.03 | 5.14 | 6.33 | 3.58 | 3.26 | 3.09 | 2.43 | 2.33 | 1.83 |

Table 4. The scale ratio and morphological distribution of compression debris of grey brick.

| Freeze-thaw cycles | Length to thickness ratio | Width to thickness ratio | Length to width ratio | Blocky debris /% | Plate debris  /% | Flake debris /% | Thin flake debris  /% |
| --- | --- | --- | --- | --- | --- | --- | --- |
| 0 | 1.06~6.01/2.99 | 0.95~3.36/1.89 | 0.49~3.24/1.59 | 75.32 | 23.39 | 1.29 | 0 |
| 10 | 1.01~6.26/3.19 | 0.95~2.44/1.69 | 0.91~3.41/1.88 | 66.24 | 31.89 | 1.87 | 0 |
| 20 | 1.03~6.31/3.29 | 0.18~3.59/1.94 | 0.19~3.36/154 | 63.21 | 32.91 | 2.88 | 0 |
| 30 | 1.24~7.47/3.69 | 0.5~4.43/2.13 | 0.47~3.68/1.76 | 59.32 | 35.02 | 5.66 | 0 |
| 40 | 1.12~7.55/3.72 | 1.06~3.9/2.09 | 1.01~4.03/1.81 | 57.54 | 38.29 | 4.17 | 0 |
| 50 | 1.23~7.76/3.79 | 0.92~3.69/2.04 | 0.82~4.28/1.87 | 54.65 | 40.62 | 3.79 | 0.94 |
| 60 | 1.12~8.22/4.08 | 0.91~5.53/2.57 | 0.86~3.22/1.59 | 49.95 | 42.67 | 6.09 | 1.29 |
| 70 | 1.04~8.69/4.01 | 0.87~4.81/2.23 | 0.91~3.37/1.72 | 45.06 | 45.95 | 7.10 | 1.89 |

Table 5. Debris fractal dimension obtained by different calculation methods.

| Numbering | Relevant parameter | Freeze-thaw cycles | Fractal dimension | Correlation coefficient |
| --- | --- | --- | --- | --- |
| ① | Equivalent side length -cumulative number | 0 | 1.994 | 0.972 |
| 10 | 1.926 | 0.971 |
| 20 | 1.903 | 0.964 |
| 30 | 1.866 | 0.973 |
| 40 | 1.746 | 0.978 |
| 50 | 1.601 | 0.971 |
| 60 | 1.449 | 0.971 |
| 70 | 1.266 | 0.968 |
| ② | Equivalent side length -cumulative mass | 0 | 2.687 | 0.932 |
| 10 | 2.668 | 0.943 |
| 20 | 2.653 | 0.931 |
| 30 | 2.648 | 0.942 |
| 40 | 2.626 | 0.919 |
| 50 | 2.613 | 0.953 |
| 60 | 2.604 | 0.936 |
| 70 | 2.581 | 0.942 |
| ③ | Maximum length - cumulative number | 0 | 1.757 | 0.947 |
| 10 | 1.668 | 0.971 |
| 20 | 1.625 | 0.958 |
| 30 | 1.584 | 0.935 |
| 40 | 1.452 | 0.912 |
| 50 | 1.329 | 0.905 |
| 60 | 1.266 | 0.939 |
| 70 | 1.162 | 0.913 |
| ④ | Maximum width - cumulative number | 0 | 1.825 | 0.962 |
| 10 | 1.771 | 0.908 |
| 20 | 1.735 | 0.907 |
| 30 | 1.689 | 0.933 |
| 40 | 1.602 | 0.914 |
| 50 | 1.513 | 0.939 |
| 60 | 1.431 | 0.921 |
| 70 | 1.332 | 0.948 |
| ⑤ | Maximum thickness -cumulative number | 0 | 2.089 | 0.939 |
| 10 | 1.951 | 0.929 |
| 20 | 1.847 | 0.952 |
| 30 | 1.746 | 0.934 |
| 40 | 1.704 | 0.924 |
| 50 | 1.627 | 0.901 |
| 60 | 1.511 | 0.923 |
| 70 | 1.305 | 0.941 |

Table 6. List of parameters of the fitted equation.

| Parameter | Cycles of freeze-thaw /N | | | | | | | |
| --- | --- | --- | --- | --- | --- | --- | --- | --- |
| 0 | 10 | 20 | 30 | 40 | 50 | 60 | 70 |
|  | 1.054 | 1.045 | 1.037 | 1.029 | 1.009 | 0.993 | 0.991 | 0.977 |
|  | 0.0445 | 0.0562 | 0.0471 | 0.0603 | 0.0747 | 0.0868 | 0.0911 | 0.111 |
|  | -152.934 | -95.095 | -86.161 | -40.731 | -159.734 | -102.691 | -43.049 | -14.366 |
|  | 0.118 | 0.115 | 0.126 | 0.138 | 0.094 | 0.101 | 0.119 | 0.158 |
|  | 0.998 | 0.989 | 0.995 | 0.992 | 0.994 | 0.981 | 0.989 | 0.955 |
